# Supplementary material for: Modification of Regulatory T Cell Epitopes Promotes Effector T Cell Responses to Aspartyl/Asparaginyl β-Hydroxylase
Source: MDPI journal article supplement (doi:10.3390/ijms232012444), 2022-10-18
Supplement: s1 [file s1]

## Supplementary Material

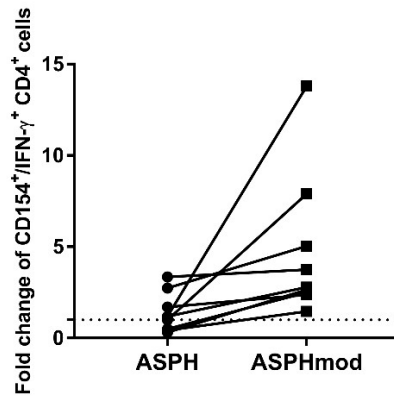

**Figure S1. ASPHmod-pulsed moDCs induce an increase in CD4<sup>+</sup>CD154<sup>+</sup>IFN- $\gamma$ <sup>+</sup> T cells.** Relative T cell response of eight individuals to ASPH- versus ASPHmod-pulsed moDCs

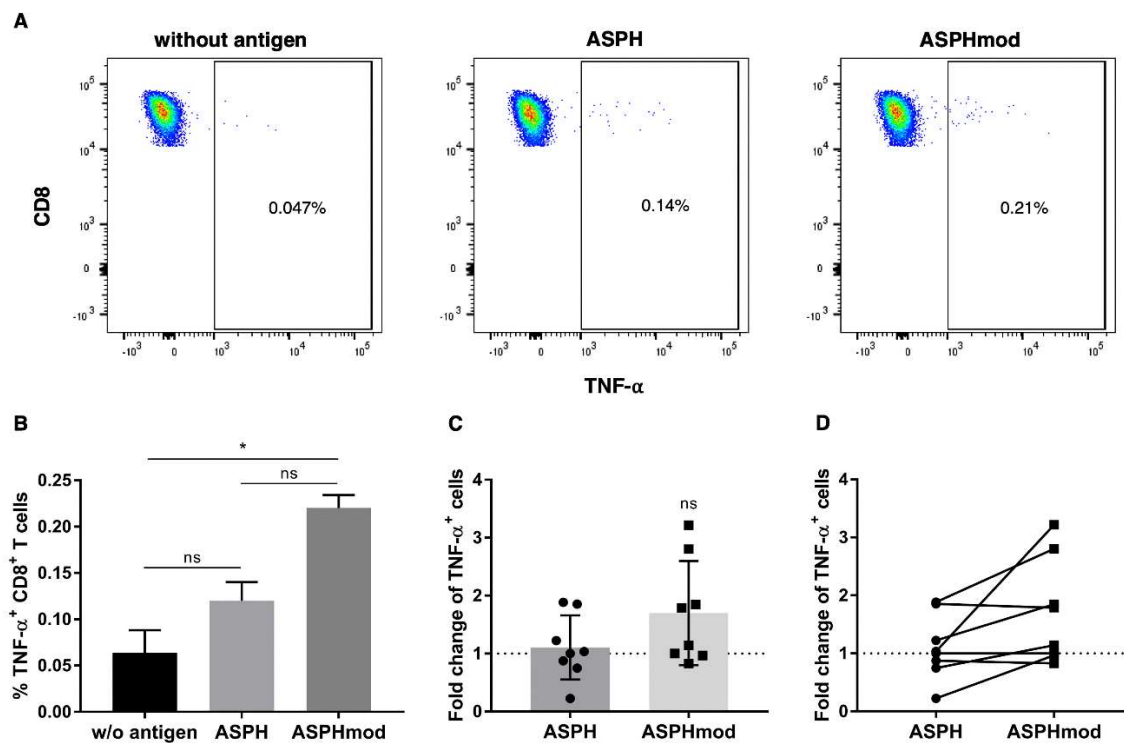

**Figure S2. ASPHmod-pulsed moDCs stimulate an increased number of CD8<sup>+</sup>TNF- $\alpha$ <sup>+</sup> T cells.** (A) Representative flow cytometric analysis of the T cells derived from a single individual after restimulation with non-pulsed, ASPH- or ASPHmod-pulsed moDCs. (B) Data represent the means  $\pm$  SD of the same individual assessed in triplicates: not significant (ns), \*significantly different,  $P < 0.05$  (Kruskal-Wallis test). (C) Fold change in CD8<sup>+</sup>TNF- $\alpha$ <sup>+</sup> T cells relative to cells restimulated with the non-pulsed moDC control. Data

represent the means  $\pm$  SD of eight individuals: not significant (ns). (D) Relative T cell responses of each individual to ASPH- versus ASPHmod-pulsed moDCs.

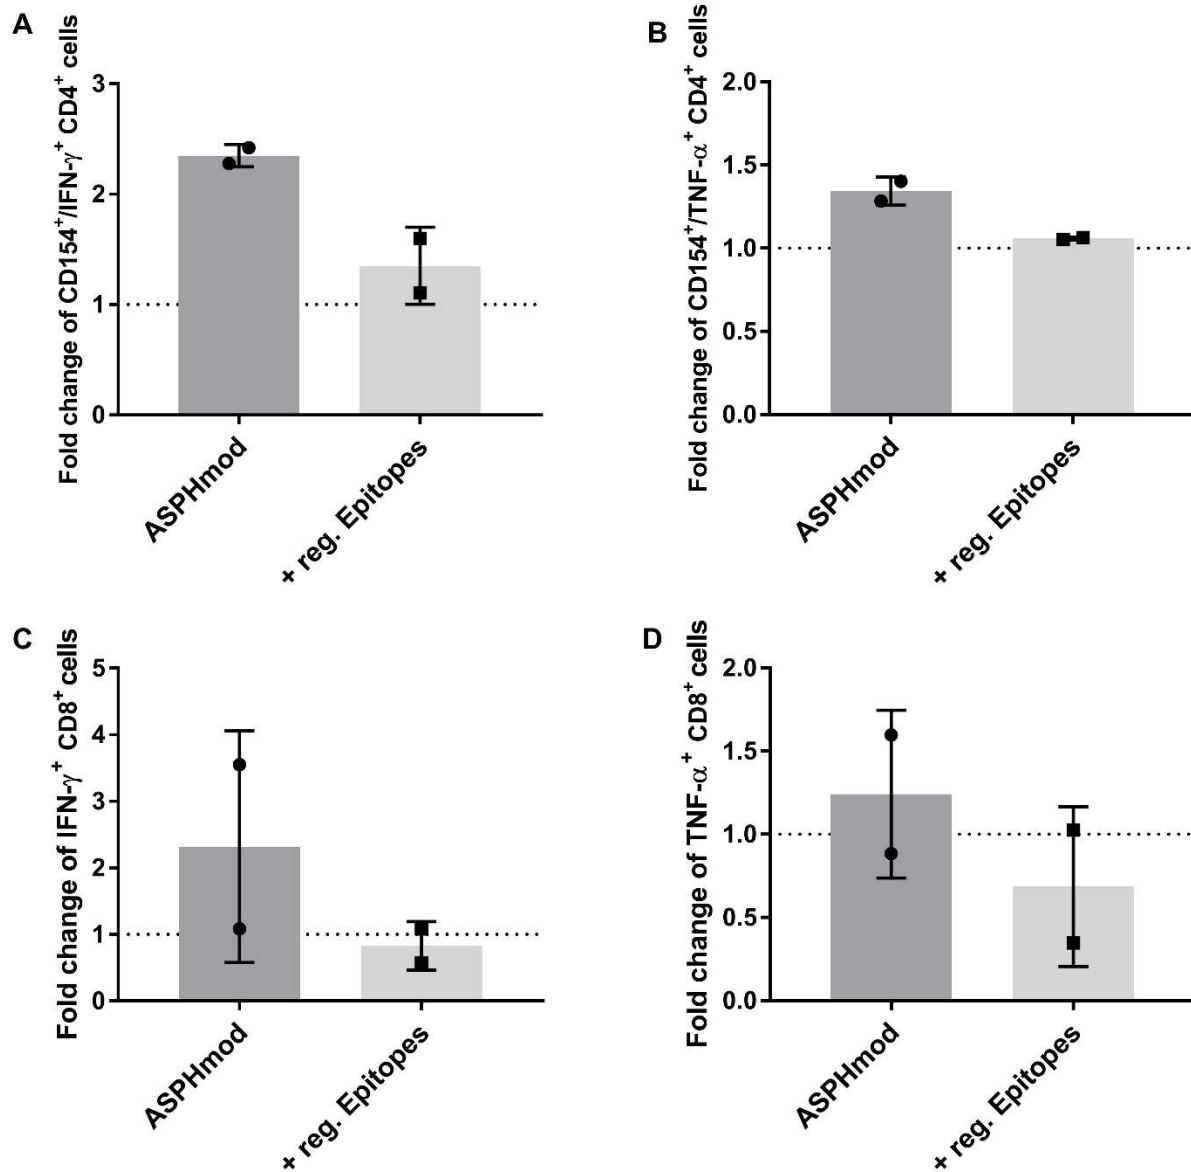

**Figure S3. Adding wild type, regulatory epitopes abrogates the increased immunogenicity of ASPHmod.** Fold change in (A) CD4<sup>+</sup>CD154<sup>+</sup>IFN- $\gamma$ <sup>+</sup> T cells, (B) CD4<sup>+</sup>CD154<sup>+</sup>TNF- $\alpha$ <sup>+</sup> T cells, (C) CD8<sup>+</sup>IFN- $\gamma$ <sup>+</sup> T cells and (D) CD8<sup>+</sup>TNF- $\alpha$ <sup>+</sup> T cells relative to cells restimulated with the non-pulsed moDC control. Data represent the means  $\pm$  SD of two individuals.

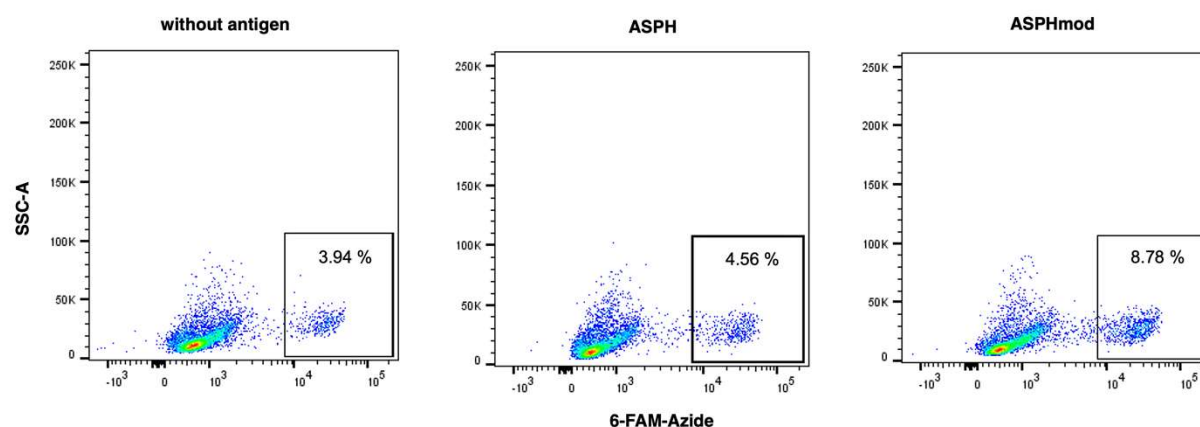

**Figure S4.** Analysis of T cell proliferation after coculture with non-pulsed, ASPH- and ASPHmod-pulsed moDCs. Representative flow cytometric analysis of T cell proliferation derived from a single individual.
